# Supplementary figures and images for: DNA Vaccine-Encoded Flagellin Can Be Used as an Adjuvant Scaffold to Augment HIV-1 gp41 Membrane Proximal External Region Immunogenicity
Source: MDPI journal article supplement (doi:10.3390/v10030100), 2018-02-27

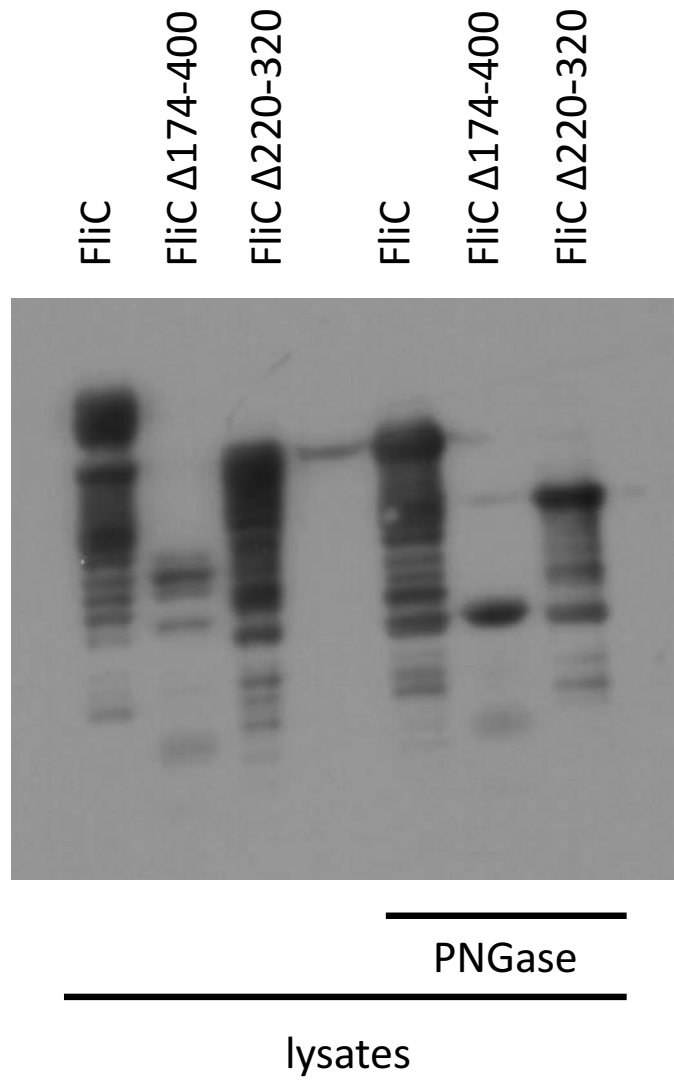

Supplement: s1 [file s1]

NetNGlyc 1.0: predicted N-glycosylation sites in Sequence

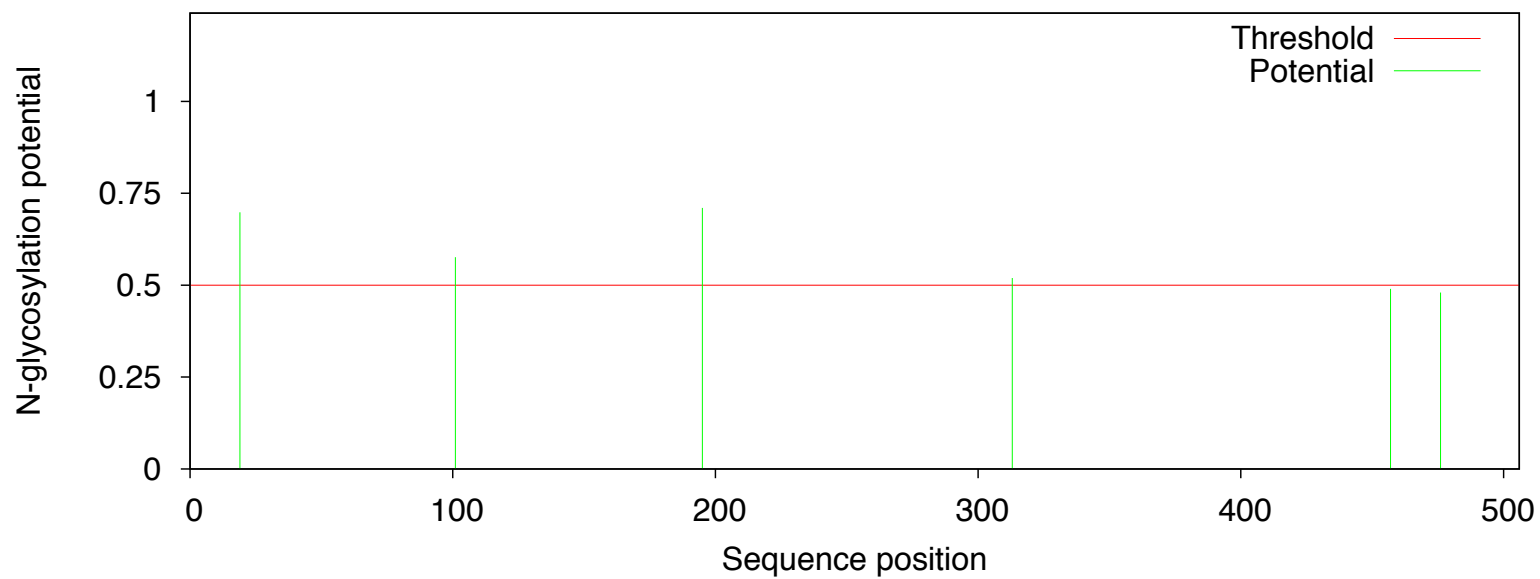

Supplement: s1 [file s1]
